# Supplementary material
Source: PubMed Central journal article supplement (PMC7194247)

Figure S2

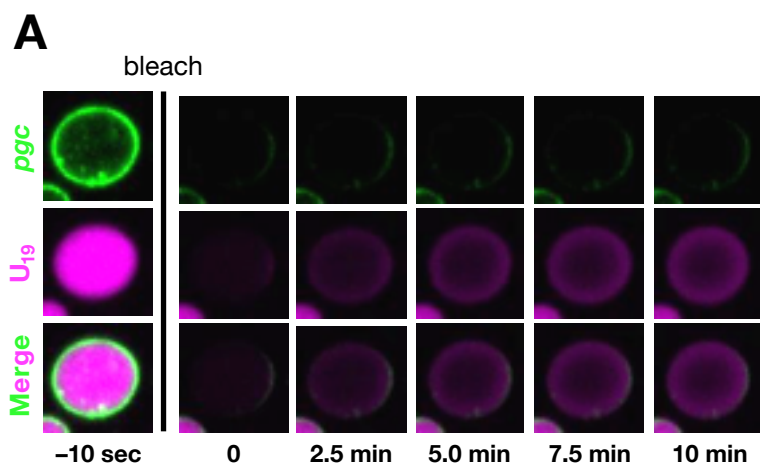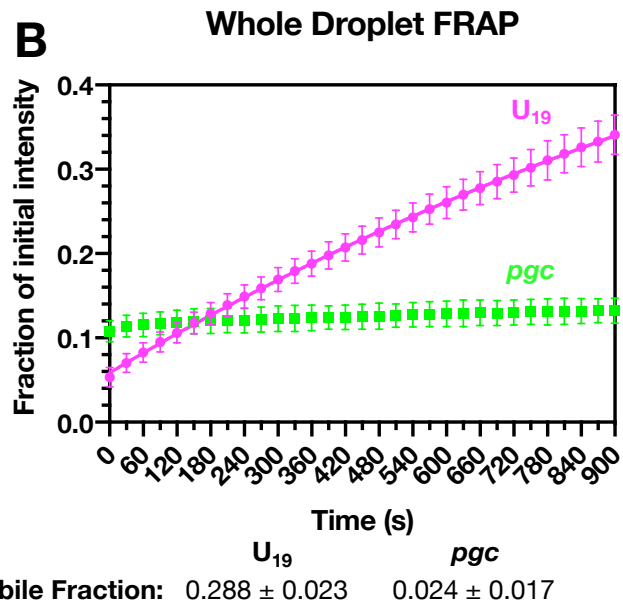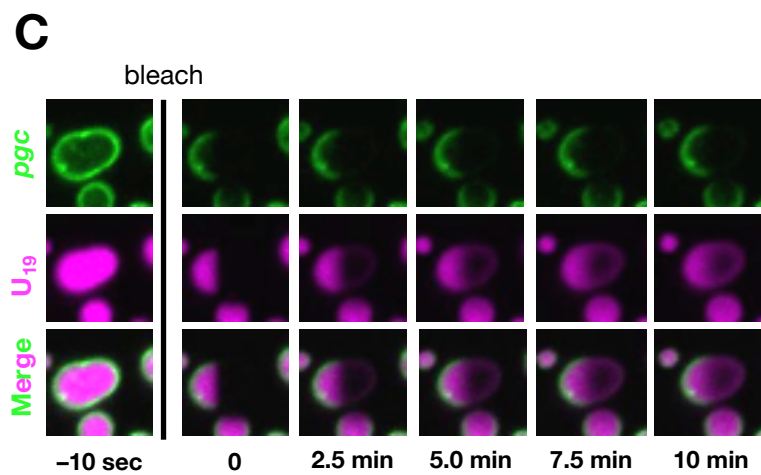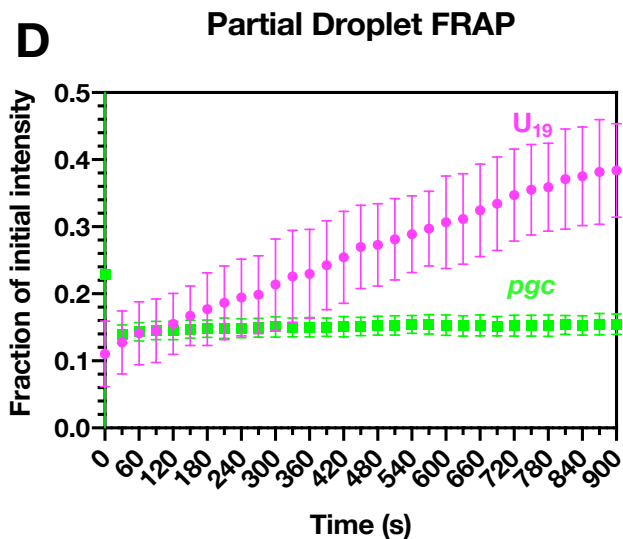

Supplement: NIHMS1569375-supplement-2.pdf [file NIHMS1569375-supplement-2.pdf]
