# Supplementary material
Source: PubMed Central journal article supplement (PMC7194247)
Supplement: NIHMS1569375-supplement-9.pdf [file NIHMS1569375-supplement-9.pdf]

| <b>RNA Name</b>          | <b>Sequence</b>                                                          | <b>Source</b>                     |
|--------------------------|--------------------------------------------------------------------------|-----------------------------------|
| A <sub>19</sub> -Cy3     | AAAAA AAAAA AAAAA AAAA-Cy3                                               | IDT                               |
| C <sub>19</sub> -Cy3     | CCCCC CCCCC CCCCC<br>CCCC-Cy3                                            | IDT                               |
| G <sub>5</sub> -Alexa488 | GGGGG-Alexa488                                                           | IDT                               |
| U <sub>19</sub> -Cy3     | UUUUU UUUUU UUUUU<br>UUUU-Cy3                                            | IDT                               |
| PTR-Cy3                  | UCUCU AAAAA UCUCU<br>AAAAA UCUCU AAAAA<br>UCUCU AAAAA UCUCU<br>AAAAA-Cy3 | IDT (see Van Treeck et al., 2018) |

**Table S1.** Sequences of fluorescent RNA oligonucleotides used in this study. See “*Fluorescent RNA nucleotides*” in the *Key Resources table*.

| Probe Name                                      | Source                                           | Identifier/Reference                           |
|-------------------------------------------------|--------------------------------------------------|------------------------------------------------|
| Oligo(dT)-Cy3                                   | IDT                                              | Khong et al., 2017a                            |
| Oligo(dT)-Cy5                                   | IDT                                              | Khong et al., 2017a                            |
| Human <i>POLR2A</i> Quasar 570 smFISH probe set | Biosearch Technologies                           | Khong et al., 2017a<br>Stock number SMF-2003-1 |
| Human <i>TFRC</i> Quasar 570 smFISH probe set   | Biosearch Technologies                           | Khong et al., 2017a<br>Stock number SMF-2006-1 |
| Human <i>NORAD</i> Cy5 smFISH probe set         | Biosearch Technologies (design), IDT (synthesis) | Khong et al., 2017a                            |
| Human <i>AHNAK</i> Cy5 smFISH probe set         | Biosearch Technologies (design), IDT (synthesis) | Khong et al., 2017a; Khong and Parker, 2018    |
| Human <i>DYNH1C1</i> Cy5 smFISH probe set       | Biosearch Technologies (design), IDT (synthesis) | Khong et al., 2017a; Khong and Parker, 2018    |
| Human <i>PEG3</i> Cy5 smFISH probe set          | Biosearch Technologies (design), IDT (synthesis) | Khong et al., 2017a                            |
| Human <i>MCM2</i> Cy5 smFISH probe set          | Biosearch Technologies (design), IDT (synthesis) | This study<br>See Table S5 for probe sequences |

**Table S2.** DNA probes for (single molecule) fluorescence in situ hybridization used in this study. See “Fluorescent in situ hybridization probes” in the Key Resources table.

| <b>RNA Name</b>                          | <b>Source</b>              | <b>Identifier/Reference</b> |
|------------------------------------------|----------------------------|-----------------------------|
| polyA homopolymer RNA,<br>potassium salt | Amersham Pharmacia Biotech | Van Treeck et al., 2018     |
| polyC homopolymer RNA,<br>potassium salt | Amersham Pharmacia Biotech | Van Treeck et al., 2018     |
| polyU homopolymer RNA,<br>potassium salt | Amersham Pharmacia Biotech | Van Treeck et al., 2018     |
| polyA homopolymer RNA,<br>potassium salt | Sigma-Aldrich              | Stock number P9403          |
| polyC homopolymer RNA,<br>potassium salt | Sigma-Aldrich              | Stock number P4903          |
| polyU homopolymer RNA,<br>potassium salt | Sigma-Aldrich              | Stock number P9528          |

**Table S3.** Homopolymer RNA potassium salts used in this study. See “Homopolymer RNA Potassium Salts” in the Key Resources table.

| <b>Primer Name</b>             | <b>Sequence</b>                           | <b>Source</b> |
|--------------------------------|-------------------------------------------|---------------|
| EIF4A1 E183Q<br>Forward Primer | CAAGATGTTTGTACTGGATCAAGCTGACGAAATGTTAAGC  | IDT           |
| EIF4A1 E183Q<br>Reverse Primer | GCTTAACATTTTCGTCAGCTTGATCCAGTACAAACATCTTG | IDT           |
| EIF4A1 R362Q<br>Forward Primer | CCAAACCGTCCACCTTGACCGATTCTGTGG            | IDT           |
| EIF4A1 R362Q<br>Reverse Primer | CCACAGAATCGGTCAAGGTGGACGGTTTGG            | IDT           |
| EIF4A1 T158Q<br>Forward Primer | CCACATCATCGTGGGTGACCCTGGCCGTGTGTTG        | IDT           |
| EIF4A1 T158Q<br>Reverse Primer | CAAACACACGGCCAGGGTCACCCACGATGATGTGG       | IDT           |

**Table S4.** Sequences of primers used in this study. See “Primers for eIF4A1 mutations” in the Key Resources table.

| <b>FISH Probe Name</b> | <b>Sequence</b>       |
|------------------------|-----------------------|
| MCM2_1                 | cgaccagaagggacacggag  |
| MCM2_2                 | tacggaacgacgacgtcatga |
| MCM2_3                 | cgcgaaaagtgggtcacgtg  |
| MCM2_4                 | ctacagcaacaaccaggttt  |
| MCM2_5                 | atagcagtaccacgatcctc  |
| MCM2_6                 | gaaggattccgatgattccg  |
| MCM2_7                 | gaggtagggcatcagtacg   |
| MCM2_8                 | atcctcaaattggtgaaggt  |
| MCM2_9                 | tacgtcctcatcatccagag  |
| MCM2_10                | tcatcgctgtcatacaggag  |
| MCM2_11                | ttctcgatgctctcgatcat  |
| MCM2_12                | acagagtggcctttgagatc  |
| MCM2_13                | tgcgaggaagttctgaag    |
| MCM2_14                | tgatgcgctcctgaagacg   |
| MCM2_15                | cacggttctcttgacatg    |
| MCM2_16                | catcaaagatctgcagcagc  |
| MCM2_17                | gtcgacttggggtacatgg   |
| MCM2_18                | catggatgtggttggtgatg  |
| MCM2_19                | atcagctggtcagatgcag   |
| MCM2_20                | cactgtgtcagttgtactt   |
| MCM2_21                | cagaaaggaccaggacgaa   |
| MCM2_22                | actggcactcaggacaggag  |
| MCM2_23                | ctccatgtgacctcaaagg   |
| MCM2_24                | cgctggtagtctgatagat   |
| MCM2_25                | ttgtgatagatgccagtcag  |
| MCM2_26                | tgtagggagccatcatag    |
| MCM2_27                | gcaaagacaggaagccatt   |
| MCM2_28                | gtggttgctaggatgacag   |
| MCM2_29                | caacctgtgtccttcttg    |
| MCM2_30                | cttgatgtctcatgacat    |
| MCM2_31                | cgacaagagcacgttgata   |
| MCM2_32                | gagaaactgcgacttcgctg  |
| MCM2_33                | ggctggacacttctcaata   |
| MCM2_34                | tcaatgagacacactcctcg  |
| MCM2_35                | ctggtcattcatcttgtaa   |
| MCM2_36                | ttcgagatggagatgctctg  |
| MCM2_37                | tcagagaaagtacgcgaggg  |
| MCM2_38                | cacacaggatgtcaaagcgt  |
| MCM2_39                | cttggcgtagatgatgtact  |
| MCM2_40                | tcaggcactgtacatcttg   |

|         |                      |
|---------|----------------------|
| MCM2_41 | cggatcatggactcgatgtg |
| MCM2_42 | tcgtcttcgatcacatagtc |
| MCM2_43 | tgtgtgtctatgaagctctc |
| MCM2_44 | caaaagtcttgcgcatgctg |
| MCM2_45 | tcacgccggaatgaaaggta |
| MCM2_46 | aaagcggttgcgctgatatg |
| MCM2_47 | tggatgtgatctgacgagc  |
| MCM2_48 | acttgttcatcctgaagagc |
| MCM2_49 | agaatccaaggaatcctta  |
| MCM2_50 | cataaagcacagagggcact |
| MCM2_51 | catcaagtgctctggtttg  |
| MCM2_52 | aacaacagtcgatccaggt  |
| MCM2_53 | taagacacactggcaaggca |
| MCM2_54 | gtggcaagatgttcagcaac |
| MCM2_55 | agtgagacaaagcactcgg  |
| MCM2_56 | tgaactcagcagctctgatc |
| MCM2_57 | aacacctaaccacacgcag  |
| MCM2_58 | tctcctgacatccatgtaag |
| MCM2_59 | aacatctcaaccagctctc  |
| MCM2_60 | gataatccgcatgactcaca |

**Table S5.** Sequences of pooled smFISH probes targeting human *MCM2* mRNA. Pooled probes were 3' end labeled. See “*Fluorescent in situ hybridization probes*” in the Key Resources table.
