# Supplementary material
Source: PubMed Central journal article supplement (PMC7194247)

**Figure S1**

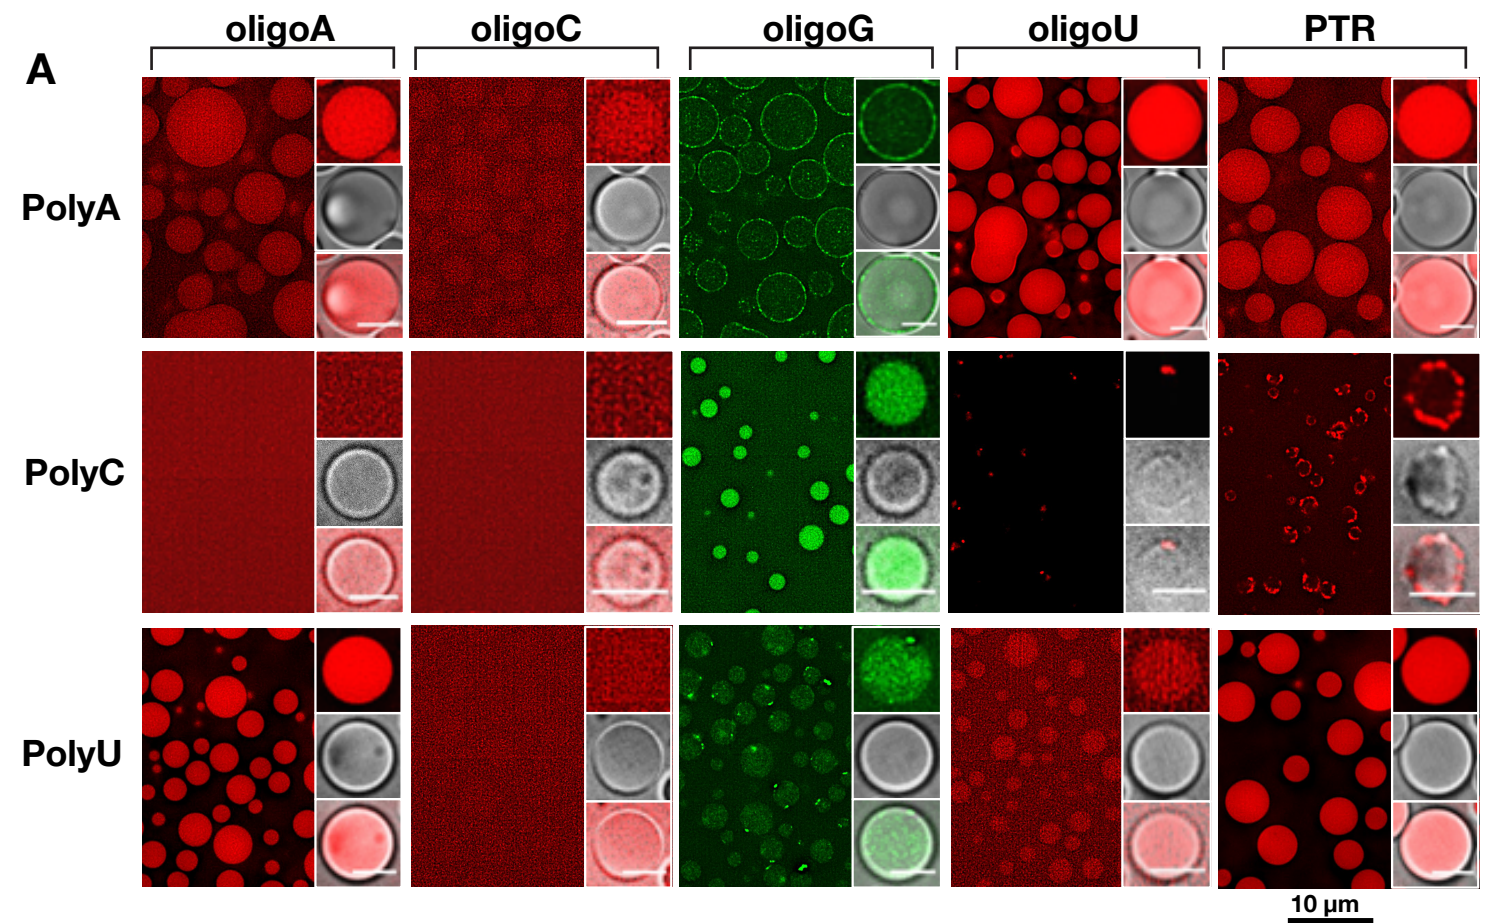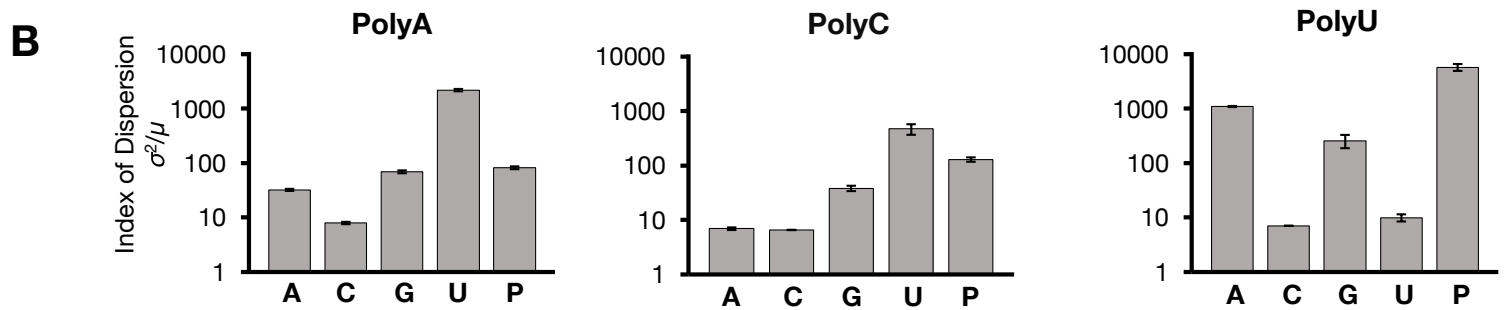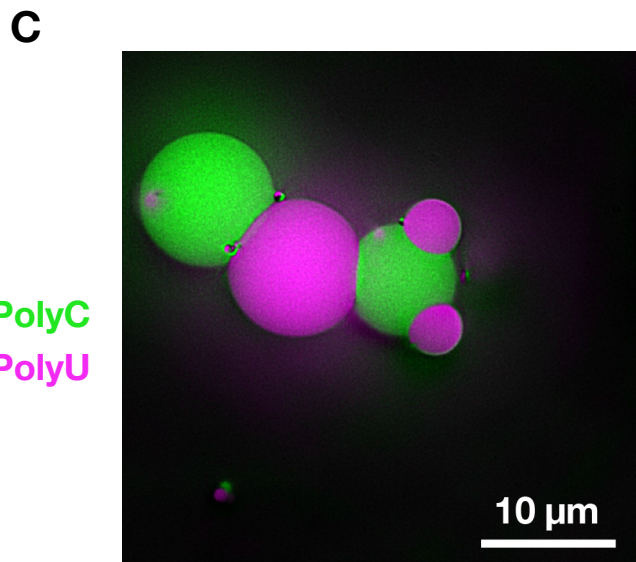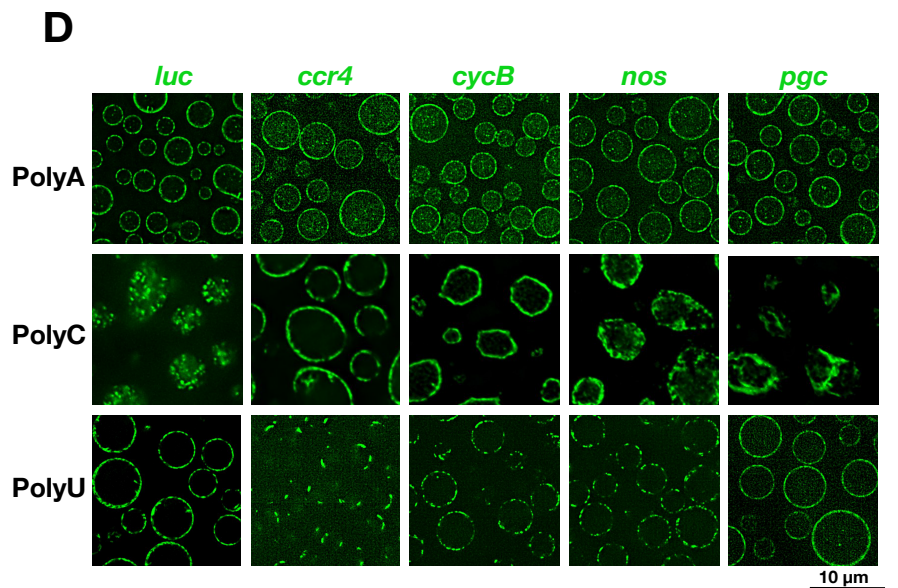

Supplement: NIHMS1569375-supplement-1.pdf [file NIHMS1569375-supplement-1.pdf]

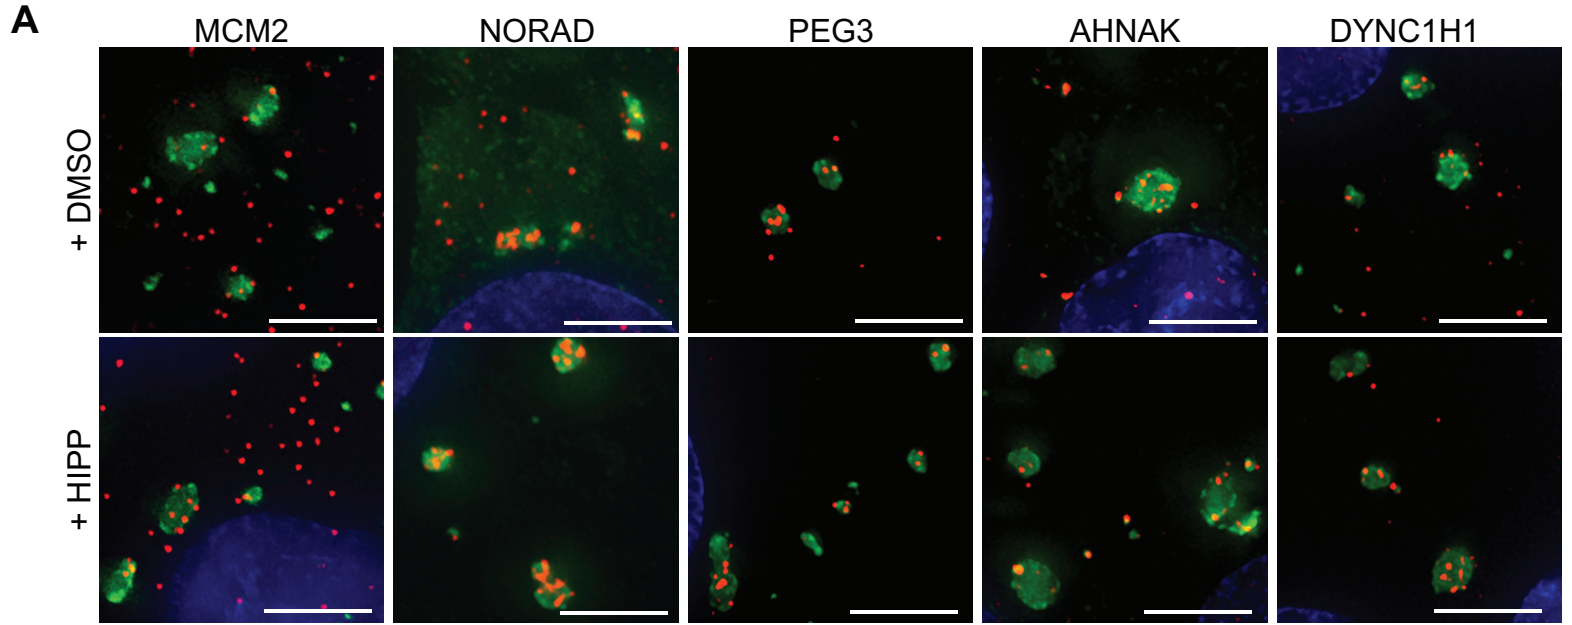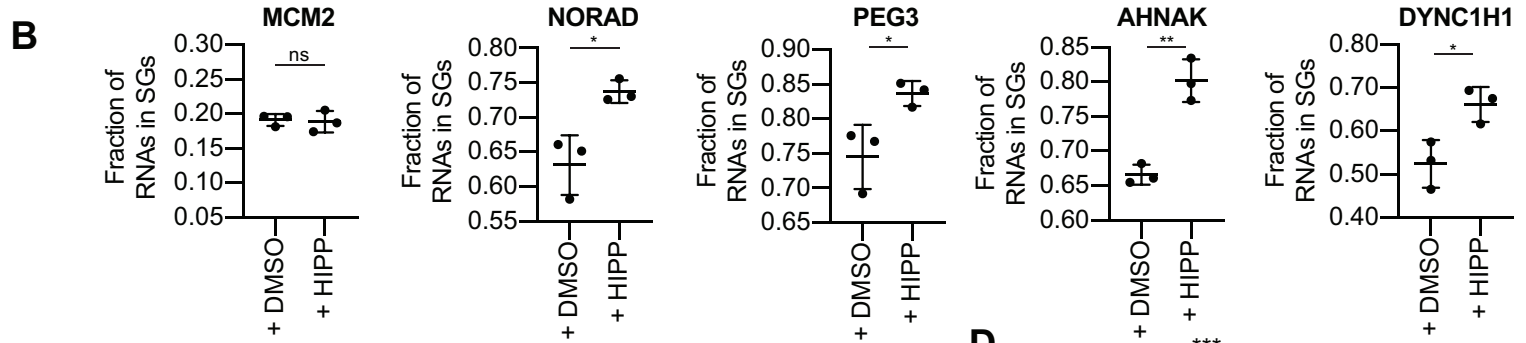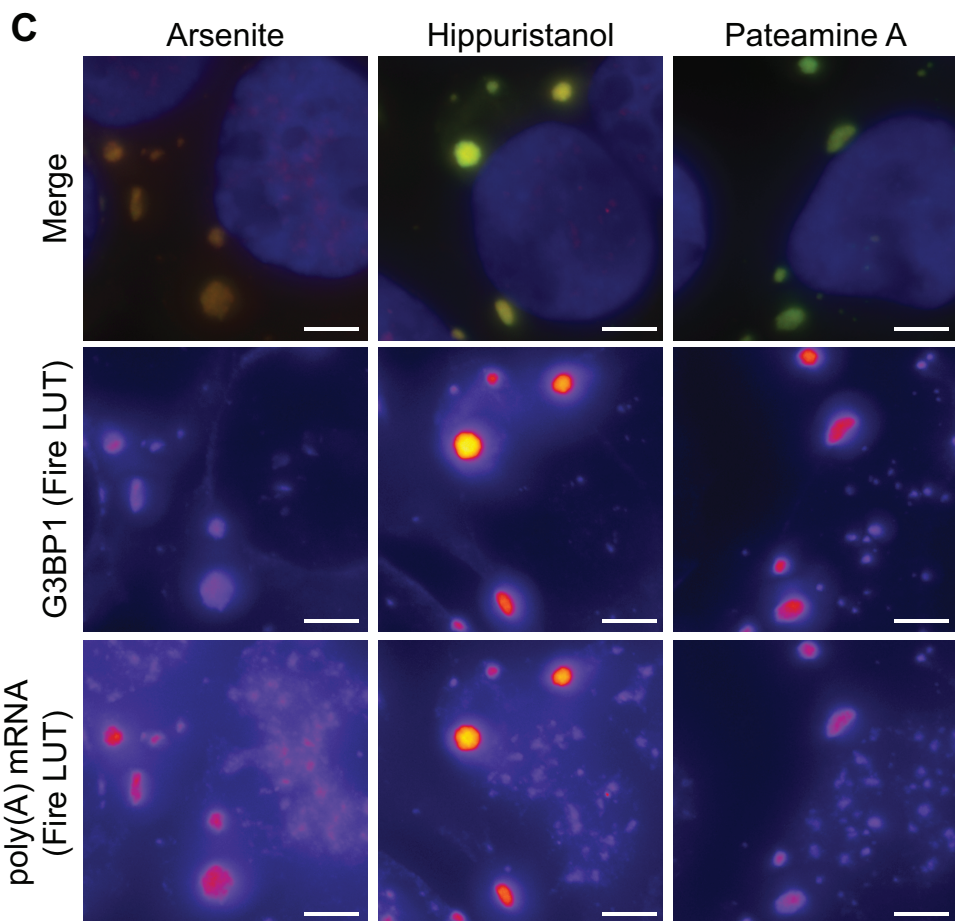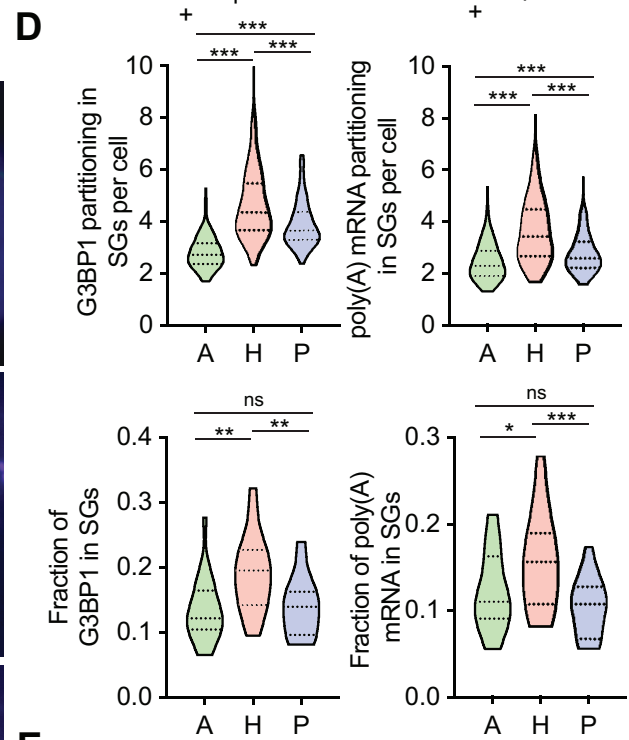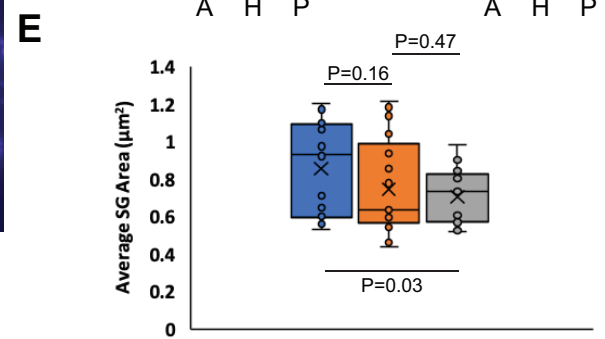

500 μM Ars 1 μM Hipp 100 nM PatA

Supplement: NIHMS1569375-supplement-3.pdf [file NIHMS1569375-supplement-3.pdf]

# Figure S4

## A

|       |   |   |   |   |   |   |
|-------|---|---|---|---|---|---|
| SGs:  | - | - | - | - | + | - |
| Ars:  | - | + | - | - | + | + |
| Hipp: | - | - | + | - | + | - |
| PatA: | - | - | - | + | - | + |

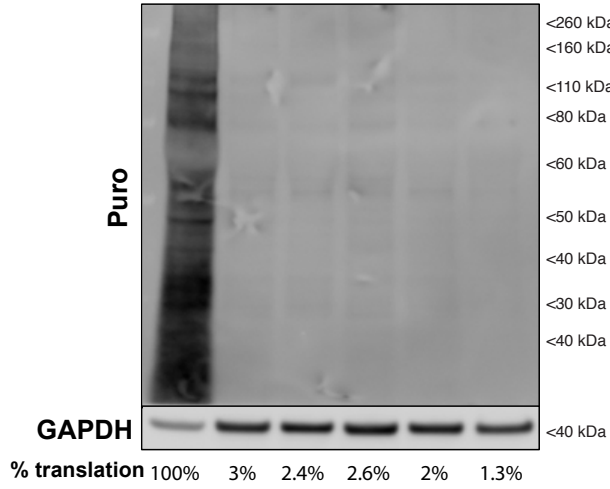

## B

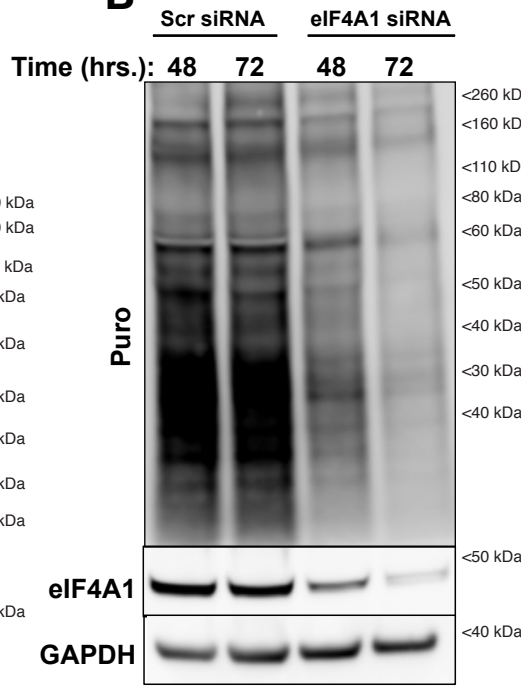

## C

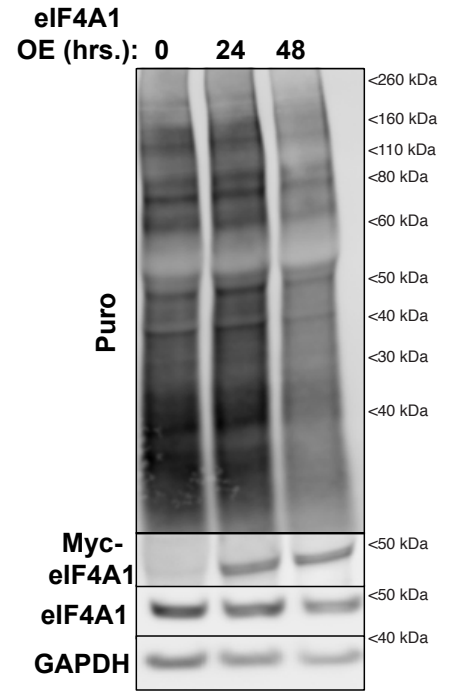

## D

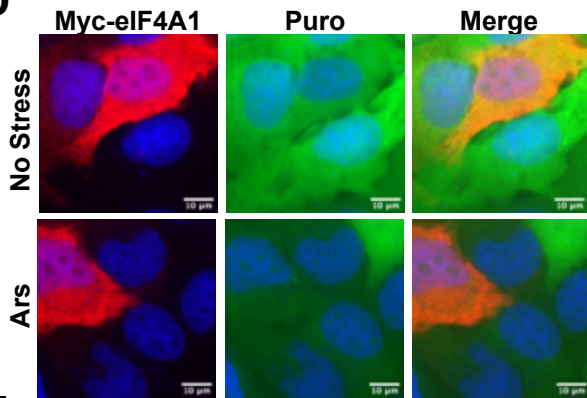

## E

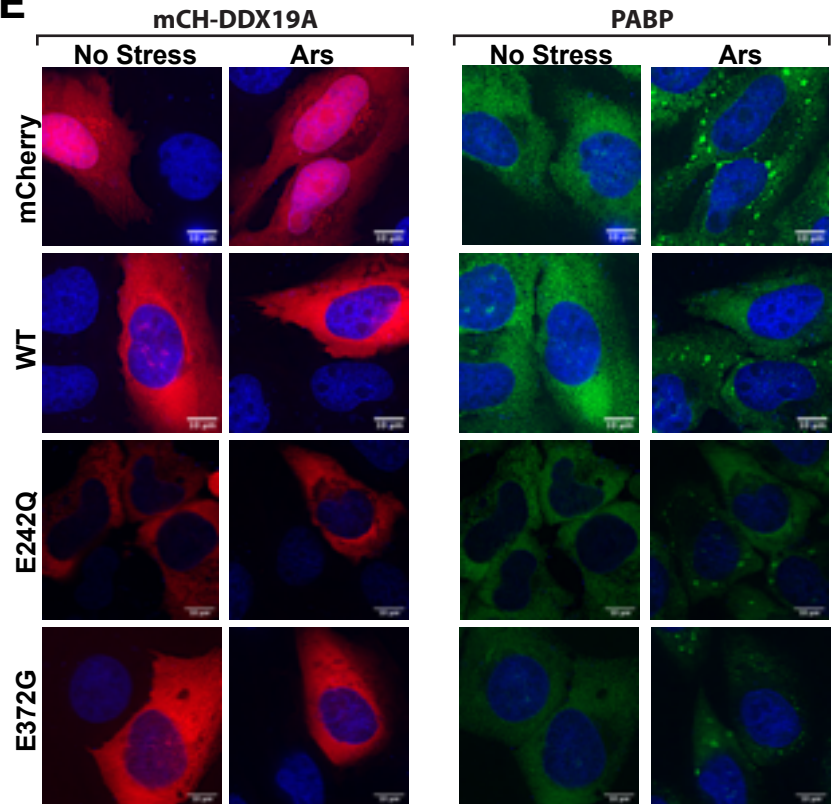

## F

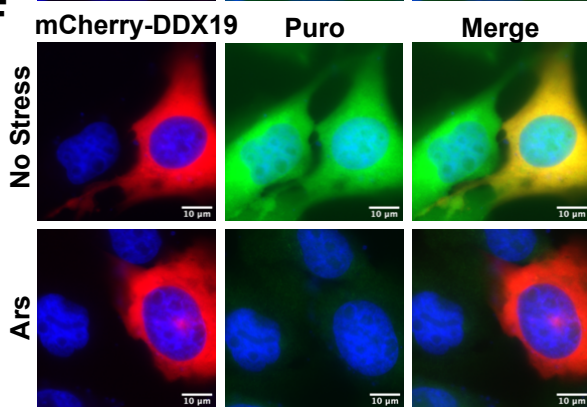

## G

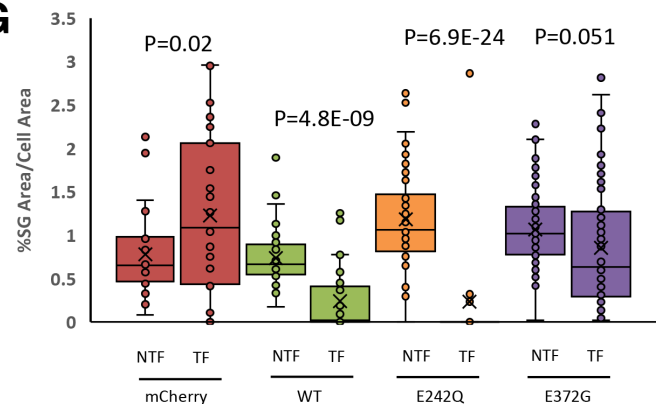

## H

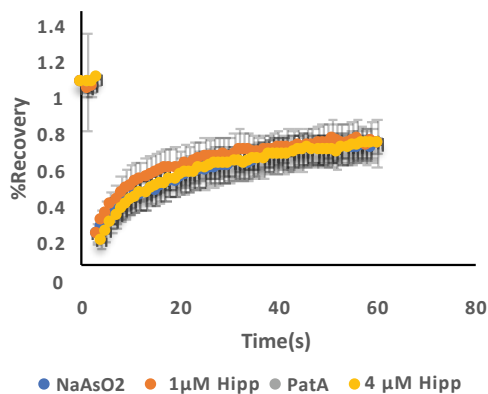

Supplement: NIHMS1569375-supplement-4.pdf [file NIHMS1569375-supplement-4.pdf]

**Figure S5**

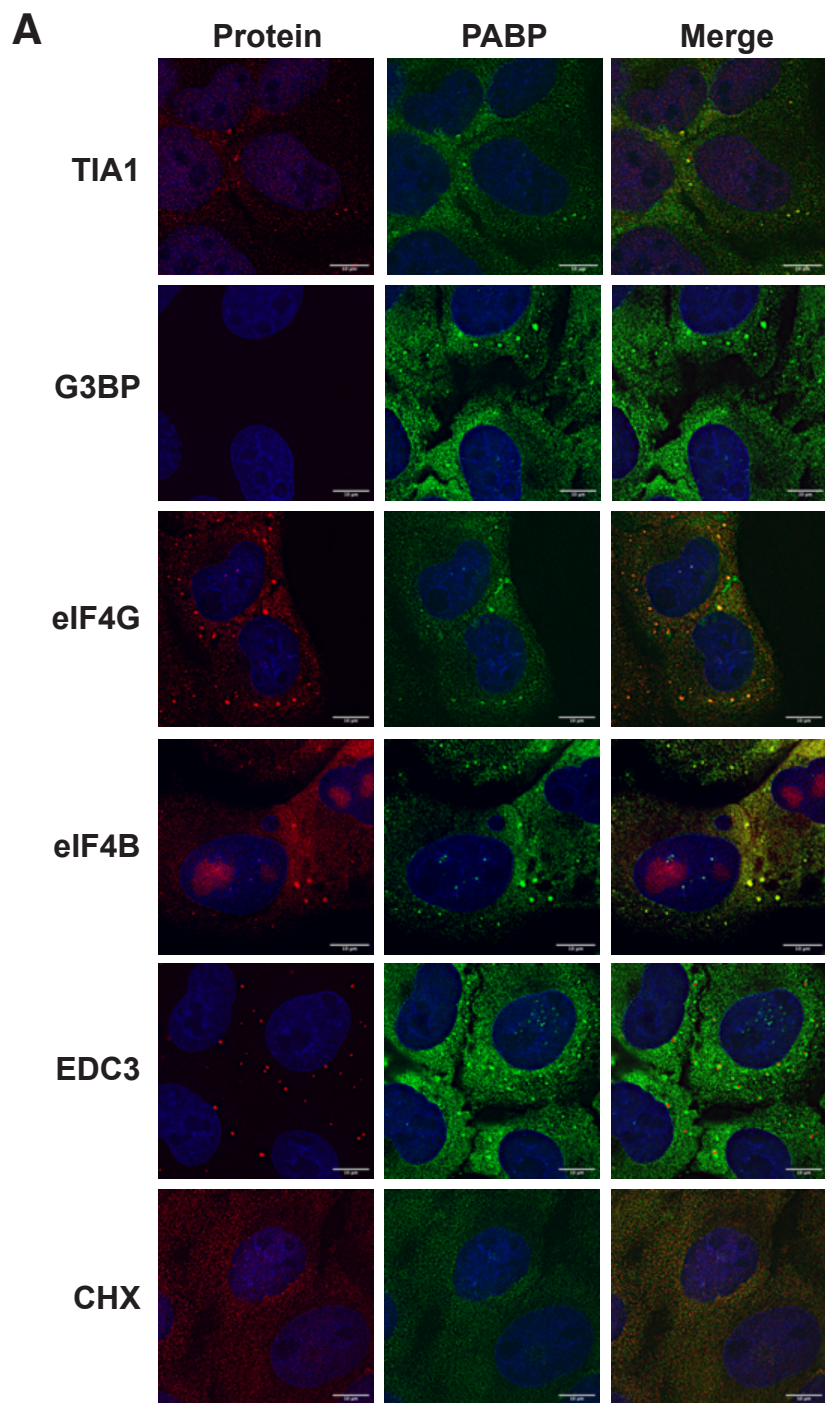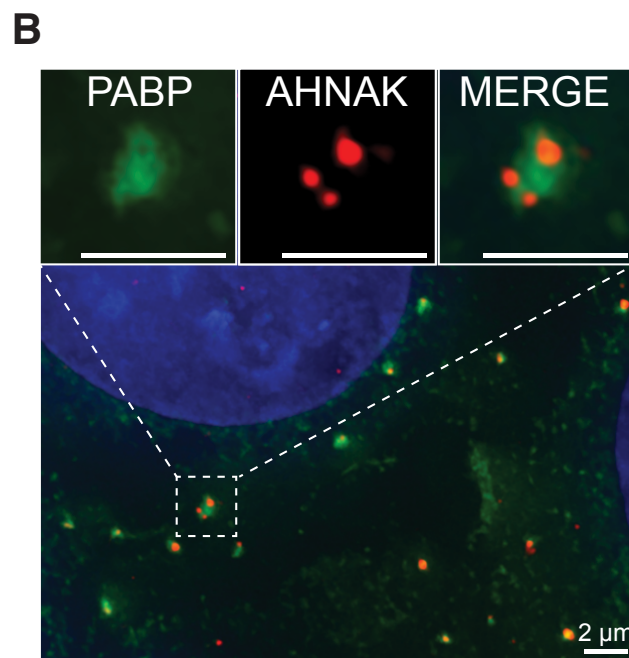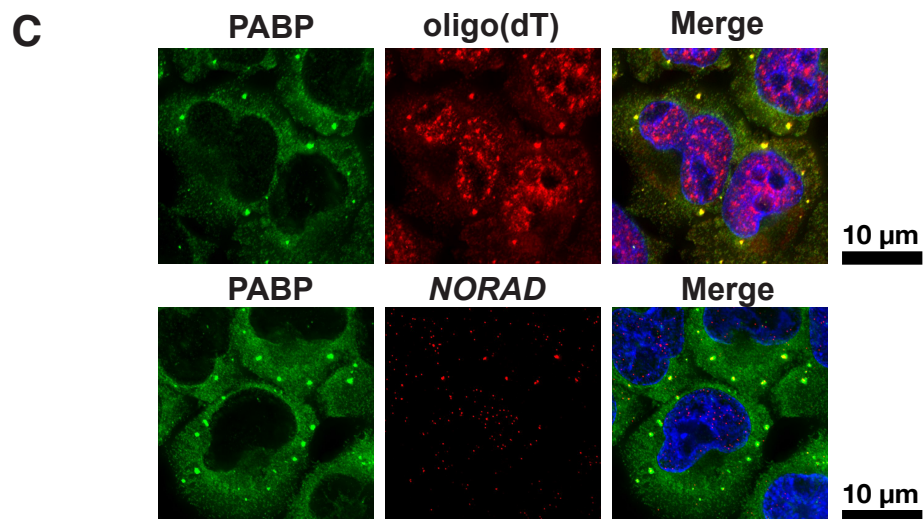

Supplement: NIHMS1569375-supplement-5.pdf [file NIHMS1569375-supplement-5.pdf]

**Figure S6**

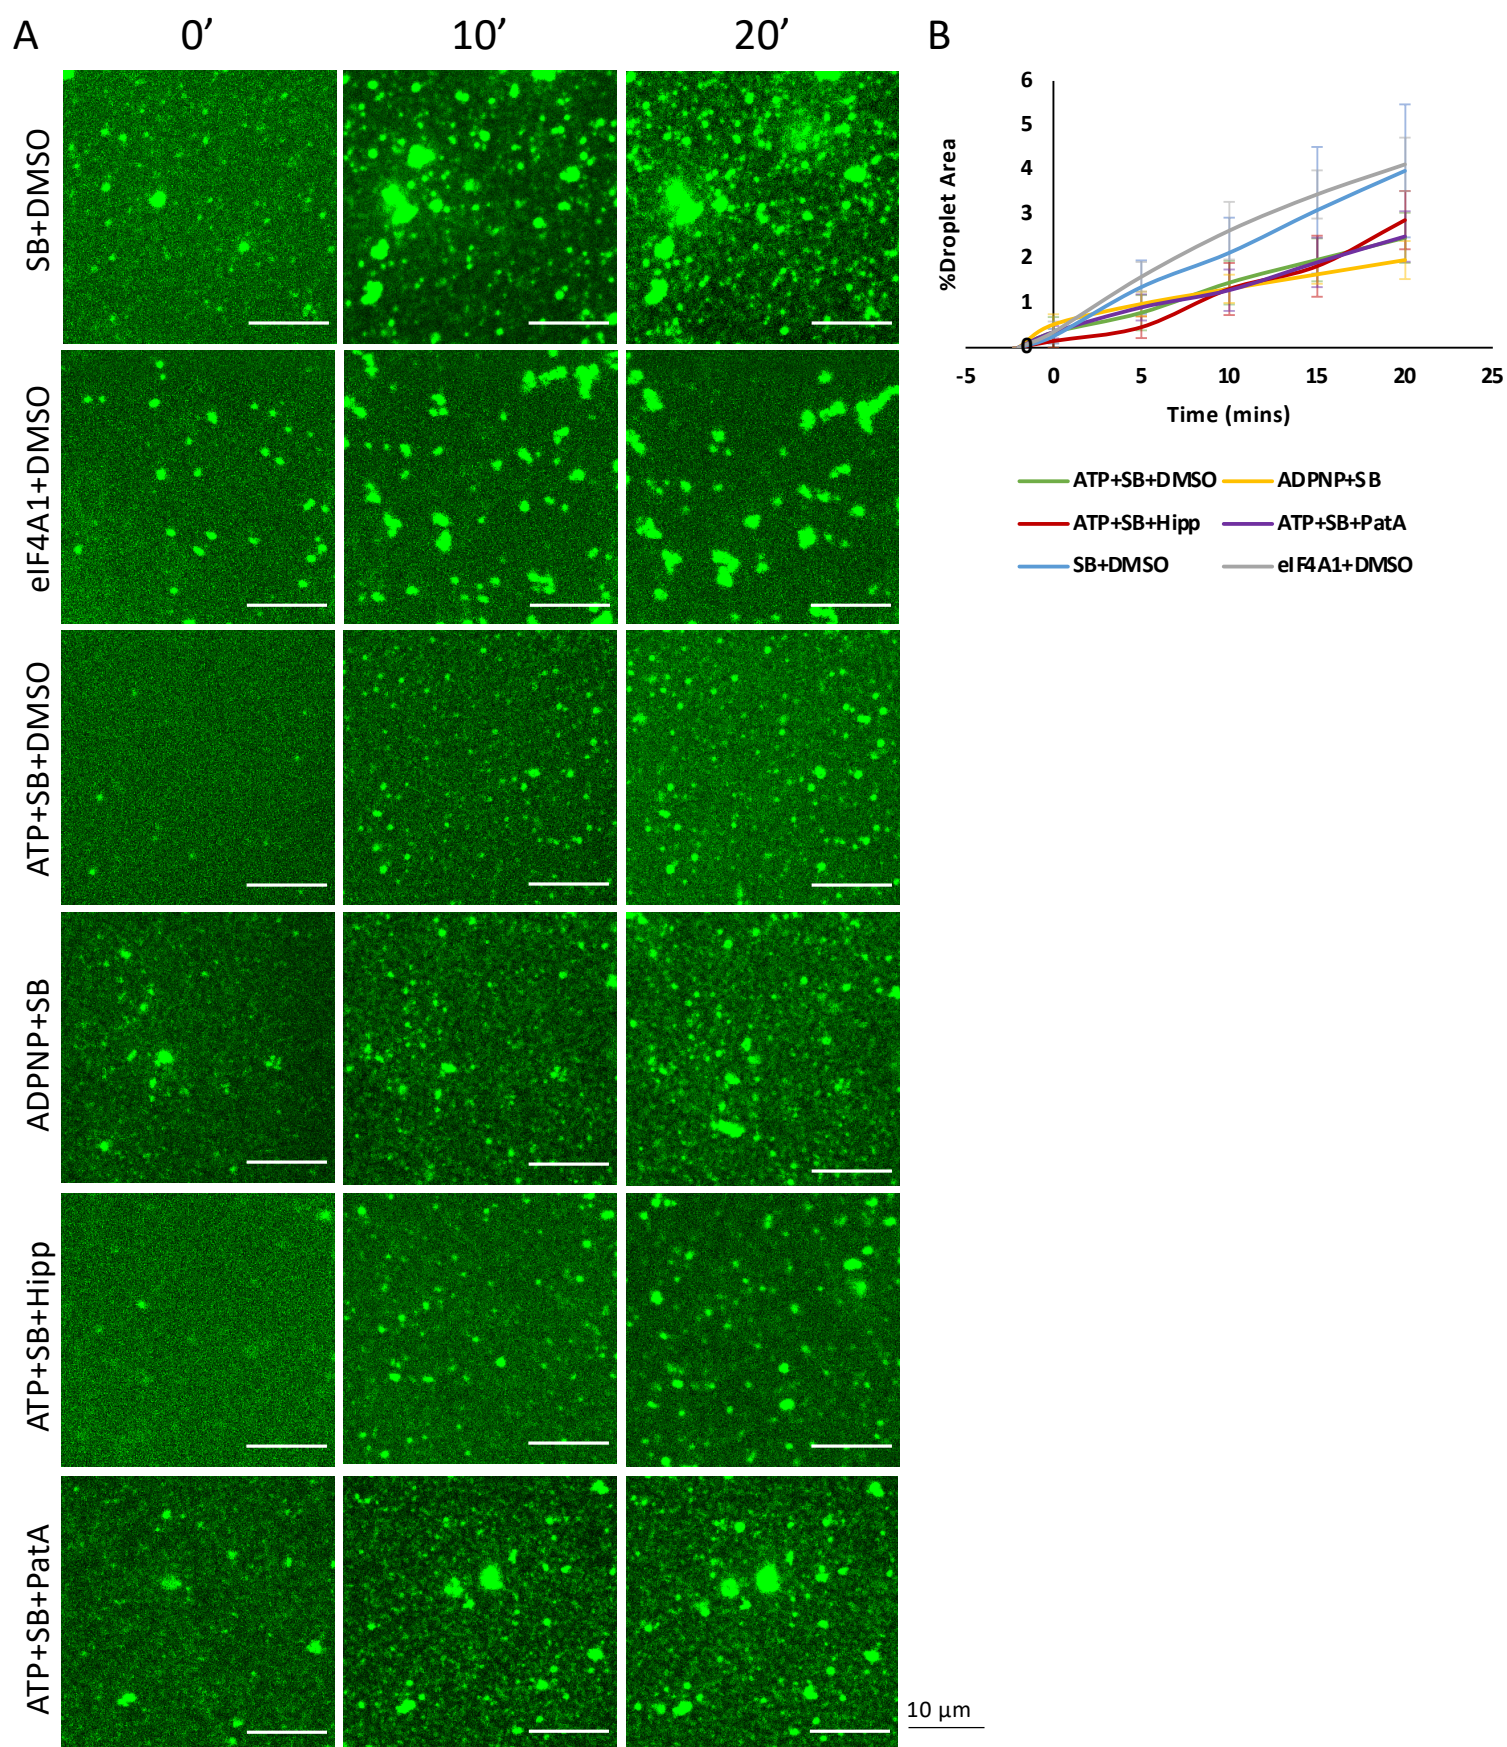

Supplement: NIHMS1569375-supplement-6.pdf [file NIHMS1569375-supplement-6.pdf]
